# Supplementary material for: In Vivo Anticoagulant and Antithrombic Activity of Depolymerized Glycosaminoglycan from Apostichopus japonicus and Dynamic Effect–Exposure Relationship in Rat Plasma
Source: MDPI journal article supplement (doi:10.3390/md20100631), 2022-10-02
Supplement: s1 [file s1]

## Supplementary Information

# In Vivo Anticoagulant and Antithrombic Activity of Depolymerized Glycosaminoglycan from *Apostichopus japonicus* and Dynamic Effect–Exposure Relationship in Rat Plasma

Han Wang <sup>1</sup>, Dandan He <sup>1</sup>, Linlin Duan <sup>1</sup>, Lv Lv <sup>1</sup>, Qun Gao <sup>1</sup>, Yuanhong Wang <sup>1,2</sup>, Shuang Yang <sup>1,2,\*</sup> and Zhihua Lv <sup>1,2,\*</sup>

<sup>1</sup> Key Laboratory of Marine Drugs, Ministry of Education of China, School of Medicine and Pharmacy, Ocean University of China, Qingdao 266003, China

<sup>2</sup> Laboratory of Marine Drugs and Bioproducts, Pilot National Laboratory for Marine Science and Technology, Qingdao 266237, China

\* Correspondence: yangshuang@ouc.edu.cn (S.Y.); lvzhihua@ouc.edu.cn (Z.L.)

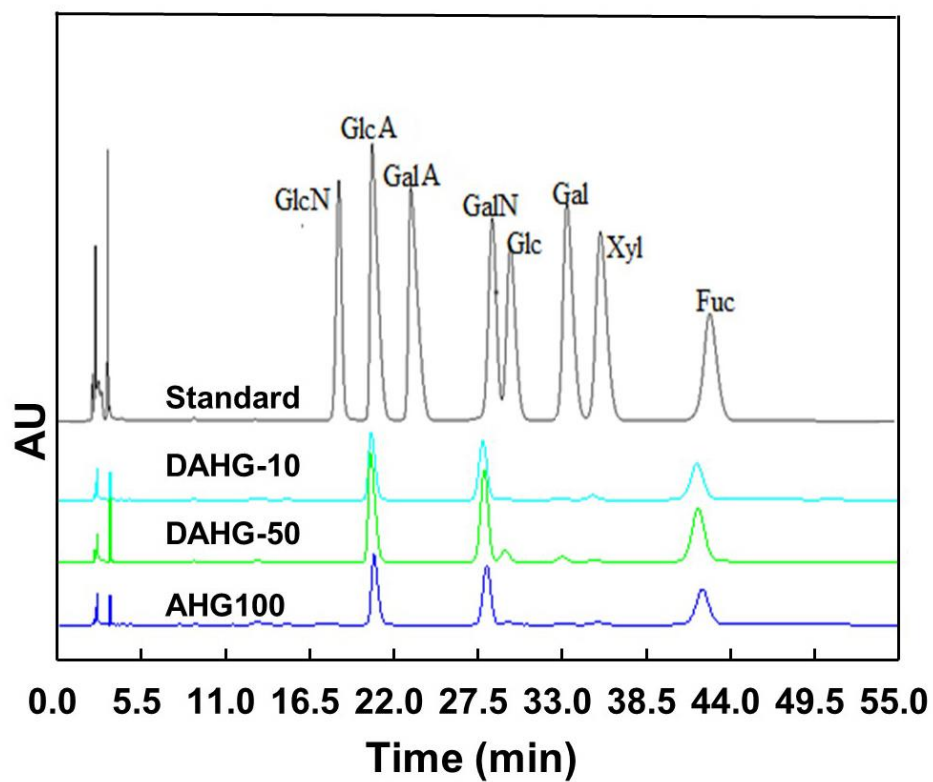

**Figure S1.** HPLC chromatography of monosaccharide composition analysis.

Note: GlcN (Nacetyl- $\beta$ -D-Glucosamine); GlcA ( $\beta$ -D-glucuronic acid); GalA ( $\beta$ -D-galacturonic acid); GalN (Nacetyl- $\beta$ -D-galactosamine); Glc (D-(+)-Glucose); Gal (D-(+)-Galactose); Xyl (D-(+)-Xylose); Fuc (L-(-)-Fucose).

**Table S1.** The PK-PD modeling parameters of residual FIIa and FXa activity fitted with  $E_{\max}$  model for DAHG10 in rats.

| Parameter                 | Oral administration (250 mg/kg) |             | Intravenous injection (5 mg/kg) |             |
|---------------------------|---------------------------------|-------------|---------------------------------|-------------|
|                           | Value (FIIa)                    | Value (FXa) | Value (FIIa)                    | Value (FXa) |
| $E_{\max}(\%)$            | 97.96                           | 105.59      | 101.59                          | 104.72      |
| $EC_{50}(\mu\text{g/mL})$ | 57.59                           | 50.75       | 49.98                           | 59.40       |
| $R_{\text{obs-pre}}$      | 0.99                            | 0.99        | 0.99                            | 0.99        |
| AIC                       | 2.56                            | 6.22        | 27.73                           | 28.65       |
| SC                        | 2.45                            | 6.11        | 27.89                           | 28.81       |

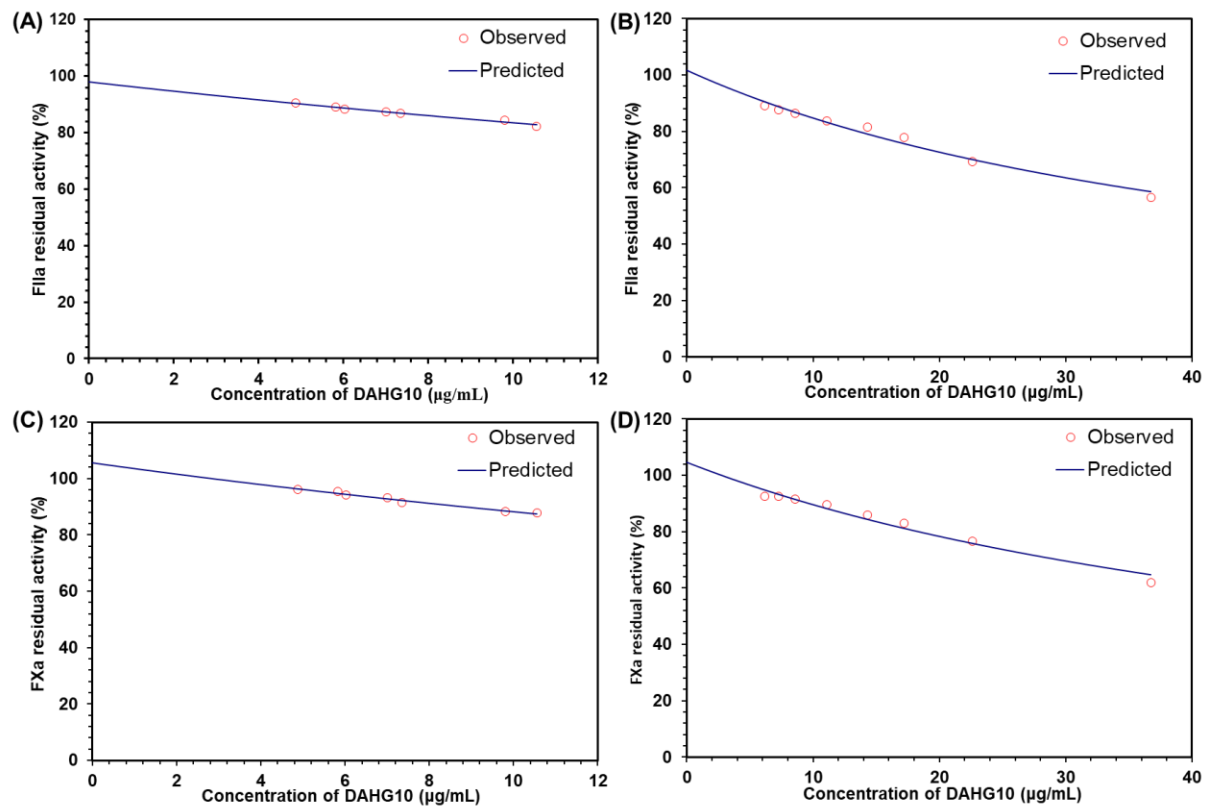

**Figure S2.** Prediction and observed mean antithrombin effect vs. time profiles for  $E_{\max}$  ( $n=4$ ). (A) residual FIIa activity of oral of DAHG10; (B) residual FIIa activity of intravenous injection of DAHG10; (C) residual FXa activity of oral of DAHG10; (D) residual FXa activity of intravenous injection of DAHG10.
